# Supplementary material for: Inhibitory Impact of Prenatal Exposure to Nano-Polystyrene Particles on the MAP2K6/p38 MAPK Axis Inducing Embryonic Developmental Abnormalities in Mice
Source: MDPI journal article supplement (doi:10.3390/toxics12050370), 2024-05-17
Supplement: s1 [file s1]

## Supplementary Material

Figure S1. Polystyrene nanoparticle (PS-NPs) characterisation. (A) Transmission electron micrograph. (B) Particle size map.

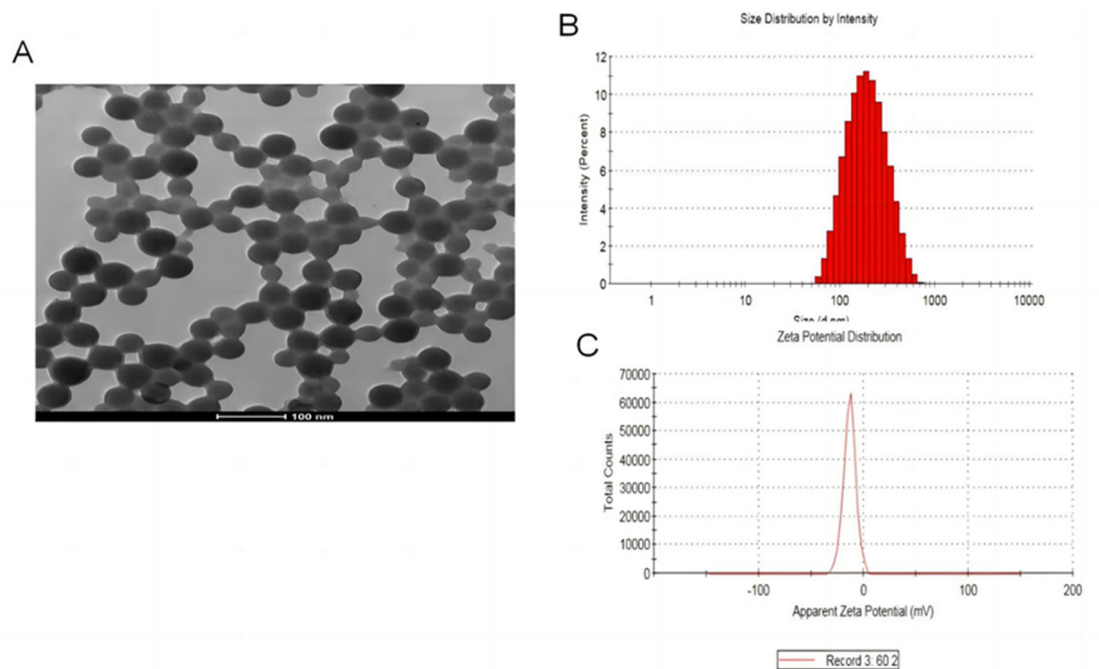

Figure S2. Biological effects of PS-NPs particles on pregnant rats. (A) Body weight of pregnant rats. (B) Trends in body weight of pregnant rats. (C) Food intake of pregnant rats. (D) Water intake of pregnant rats. Data are represented as the mean  $\pm$  SEM.

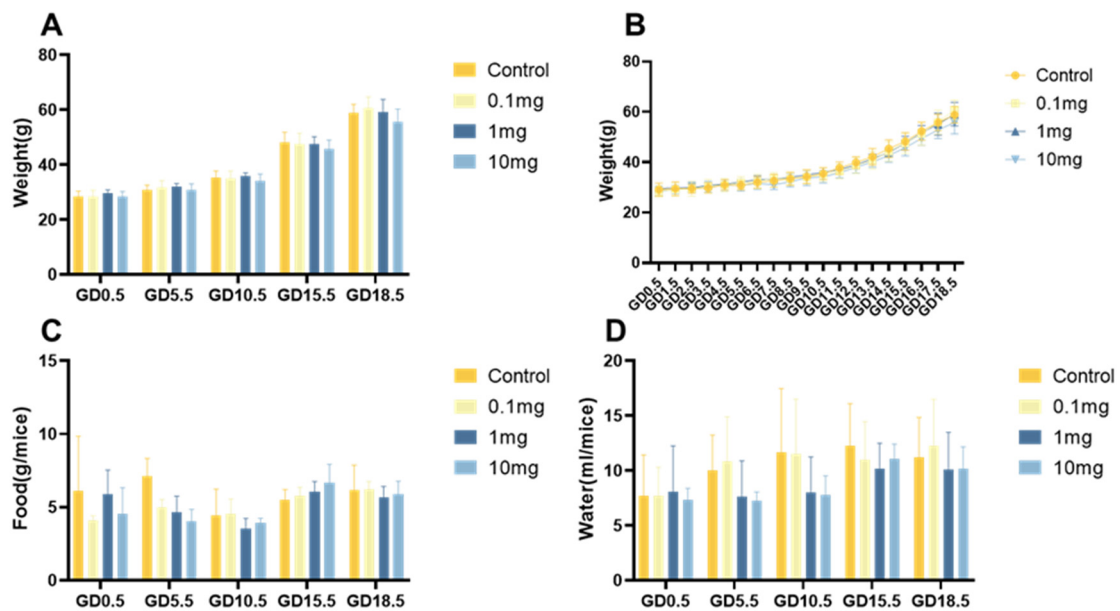

Figure S3. Differential analysis of placental expression and pathway analysis in PS-NPs pregnancy-exposed female rats. (A) MA plot of mRNA differentially expressed genes. (B) GO enrichment analysis bubble plot. (C) GO enrichment analysis histogram. (D) KEGG classification statistics histogram. (E) GO classification statistics bar graph.

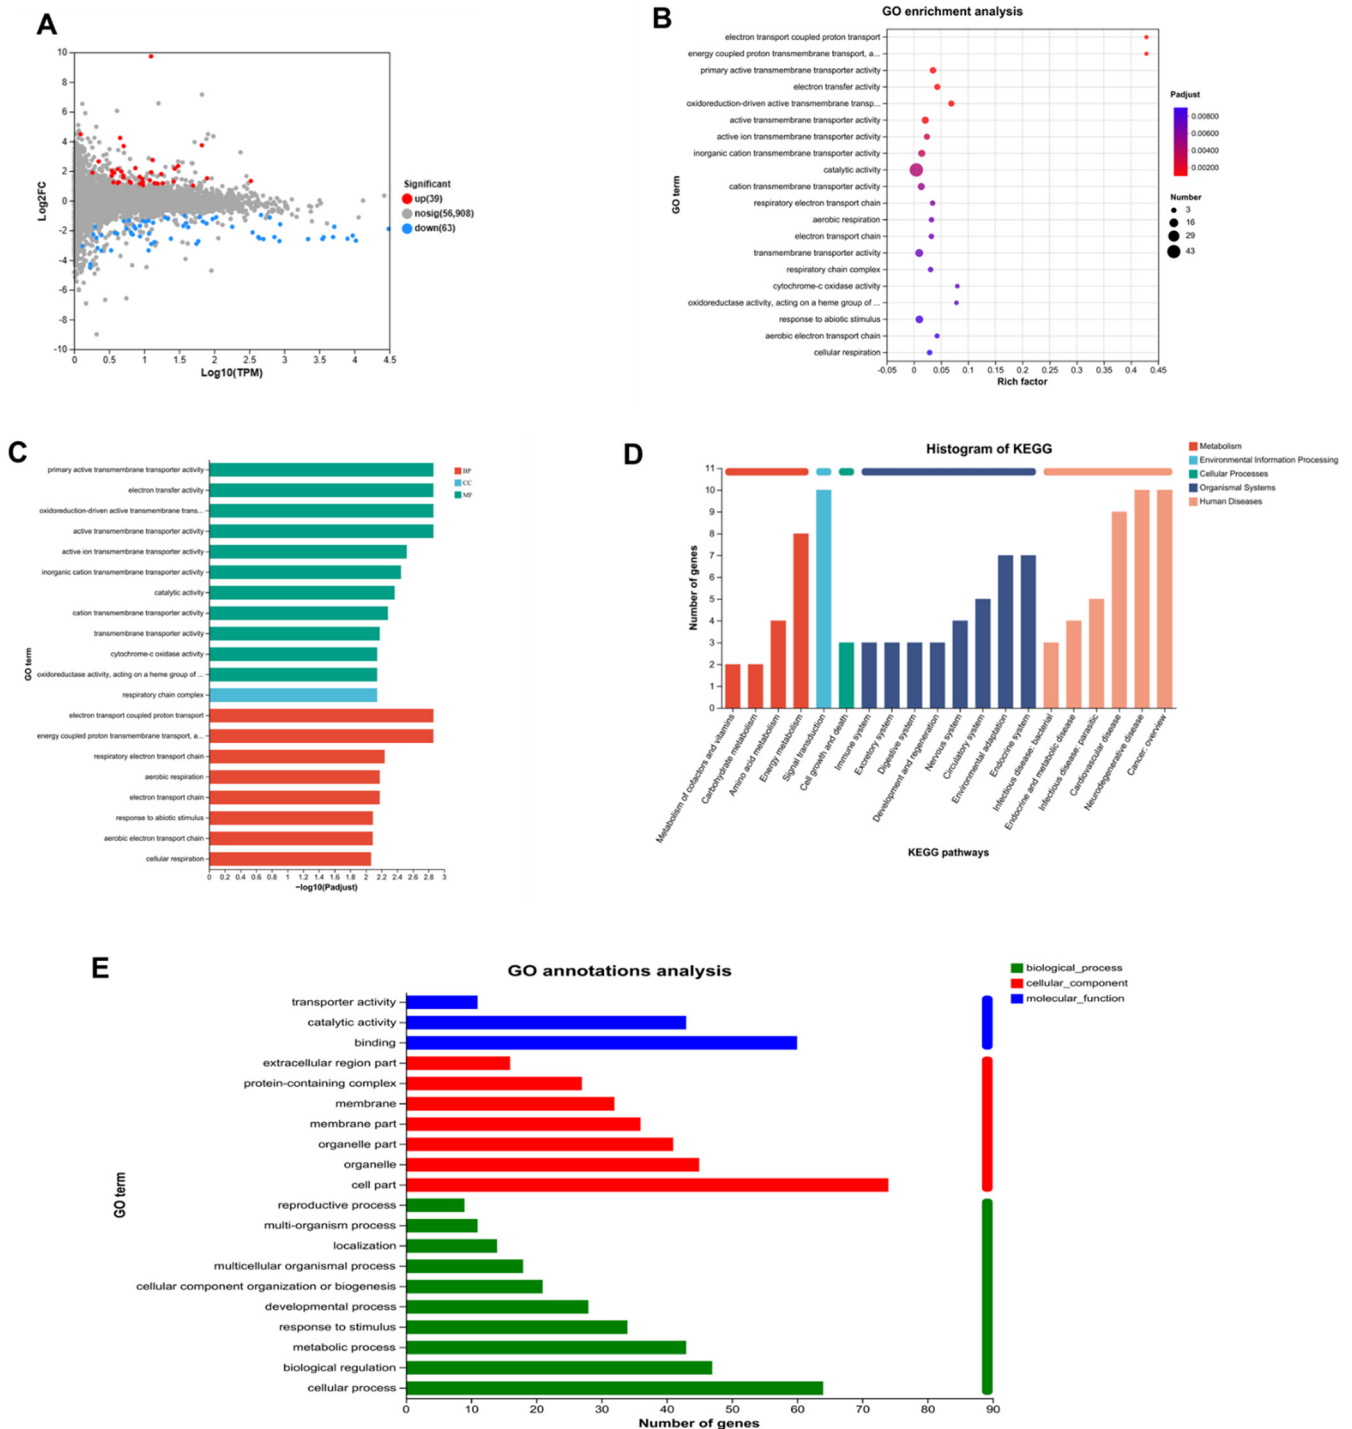

Figure S4. Validation of qRT-PCR of differentially expressed genes in the placenta of female mice. (A) *Cacng4*. (B) *MAP2K6*. (C) *Flt1*. (D) *Dtx3l*. \*\* $P < 0.01$ , \*\*\*\* $P < 0.0001$ .

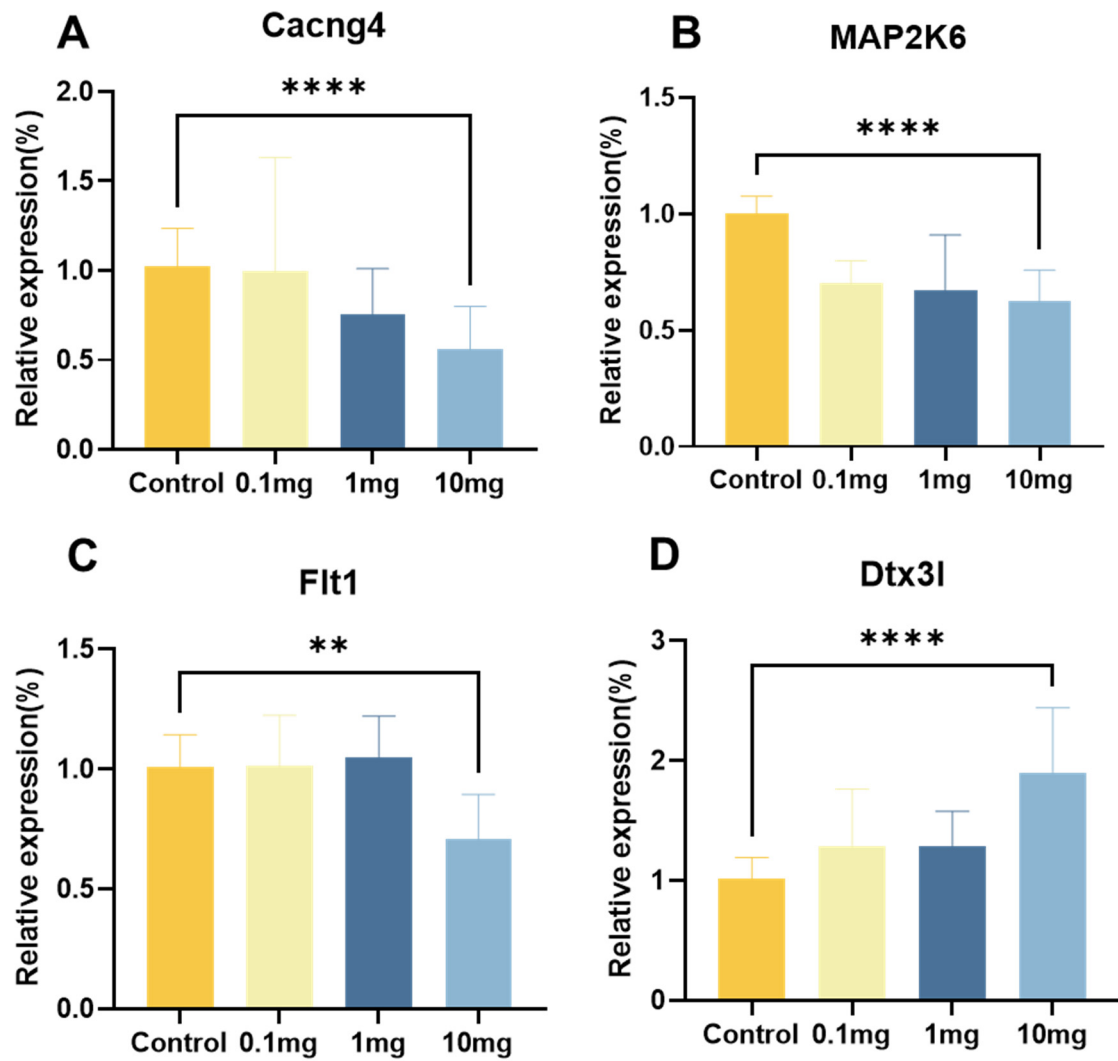

**Table S1.** Primers for real time qRT-PCR.

| Gene        |         | Sequences of primers (5'-3') |
|-------------|---------|------------------------------|
| GAPDH(MMU)  | forward | TGTTTCCTCGTCCCGTAG           |
|             | reverse | CAATCTCCACTTTGCCACT          |
| Map2k6(MMU) | forward | ATGTCTCAGTCGAAAGGCAAG        |
|             | reverse | TTGGAGTCTAAATCCCGAGGC        |
| Cacng4(MMU) | forward | CCCATCCTCAGCACCATTTCT        |
|             | reverse | CCCGTGTTGCTGGAAATGTA         |
| Flt1(MMU)   | forward | AGGGATAACAGGCAATTCTGC        |
|             | reverse | GTGCATCTCTATGAAAGGACTCC      |
| Dtx3l(MMU)  | forward | GGTCTCTGGATGAAGCACTT         |
|             | reverse | AGAGAGCAGGTCACAGTTCA         |
| GAPDH(HSA)  | forward | CAGGAGGCATTGCTGATGAT         |
|             | reverse | GAAGGCTGGGGCTCATTT           |
| Map2k6(HSA) | forward | TCAATGCTCTCGGTCAAGTG         |
|             | reverse | GTGATGCCCAGACTCCAAAT         |

**Table S2.** Antibodies for western blot.

| Antibodies                                                   | RRID       | Source                         |
|--------------------------------------------------------------|------------|--------------------------------|
| p38-MAPK(WB1:1000)                                           | AB_2878007 | Proteintech,Illinois, USA      |
| Goat anti-rabbit IgG (H+L)(WB1:1000)                         | AB_2722564 | Proteintech,Illinois, USA      |
| Phospho-p38 MAPK(WB1:1000)                                   | AB_2918205 | Proteintech,Illinois, USA      |
| Tubulin $\beta$ polyclonal antibody(WB1:1000)                | AB_2797447 | Bioworld biotech,Nanjing,China |
| HRP-conjugated Affinipure Goat Anti-Mouse IgG(H+L)(WB1:1000) | AB_2722565 | Proteintech,Illinois, USA      |
| Anti-MAP2K6 (WB1:1000)                                       |            | Bbi life sciences corporation, |
